# Supplementary material
Source: PubMed Central journal article supplement (PMC3003413)
Supplement: supp_M110.158352_jbc.M110.158352-1.pdf [file supp_M110.158352_jbc.M110.158352-1.pdf]

## Supplemental Material

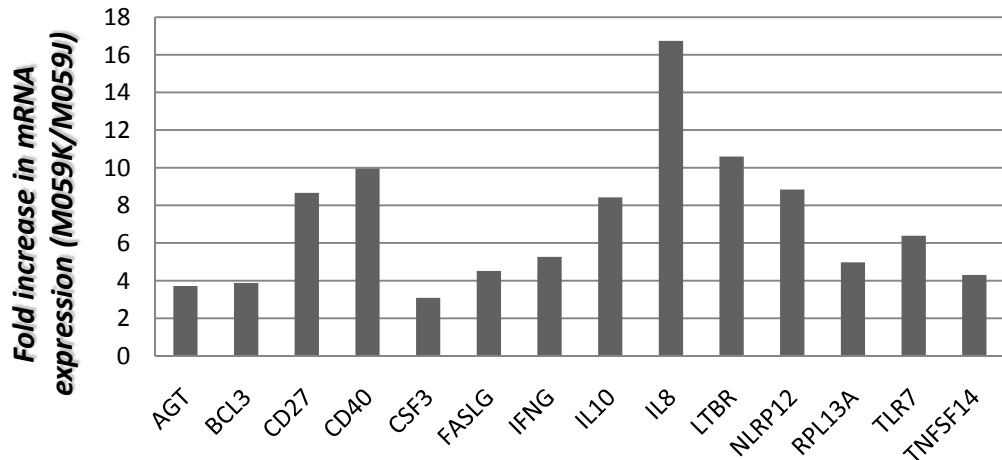

**Figure S1.** M059K and M059J cells were stimulated with 10 ng/ml TNF for 6h, after which total RNA was prepared and subjected to cDNA generation followed by quantitative PCR with primers specific to the aforementioned genes or  $\beta$ -actin. The data is expressed as fold increase in mRNA expression in TNF-treated M059K cells over their M059J counterparts.

Genes that are considered as NF- $\kappa$ B-dependent but did not respond to TNF within the 6 h of treatment are IL-2, P-selectin, CD44, Endoglin, Tenascin, and TIMP2.

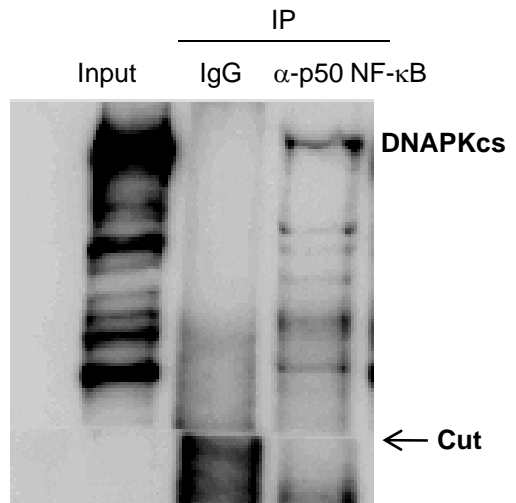

**Figure S2.** The complete immunoblot depicted in Fig. 3C. The bottom portion of the filter was cut to be probed with a different antibody.
